# Supplementary material
Source: PubMed Central journal article supplement (PMC3435139)
Supplement: chest_142_3_704_ds01.pdf [file chest_142_3_704_ds01.pdf]

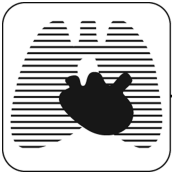

## Relationship Between Lung Function Impairment and Health-Related Quality of Life in COPD and Interstitial Lung Disease

*Cristine E. Berry, MD; M. Bradley Drummond, MD; MeiLan K. Han, MD; Daner Li, MS; Cathy Fuller, MS; Andrew H. Limper, MD, FCCP; Fernando J. Martinez, MD, FCCP; Marvin I. Schwarz, MD, FCCP; Frank C. Sciurba, MD, FCCP; and Robert A. Wise, MD, FCCP*

### **e-Appendix 1.**

Because of concern that hyperinflation and gas transfer defects were potential confounders of the relationships between lung function, diagnosis, and HRQL score, we performed supplementary analyses including diffusing capacity (DLCO) and ratio of inspiratory capacity to total lung capacity (IC/TLC) in our model. These variables were not included in the main model because the data was unavailable for over 20% of patients (n=107 (18.6%) for COPD, n=97 (24.0%) for ILD), and the data was not missing at random. Patients with missing data for IC/TLC ratio and/or DLCO were younger with lower lung function and worse HRQL scores. They were significantly less likely to have a cancer diagnosis and more likely to require supplemental oxygen at rest. In addition, the type of tissue collection performed was different compared to those with IC/TLC and DLCO data available.

When IC/TLC ratio and DLCO were added to the regression model, the magnitude of regression coefficient for diagnosis was slightly decreased, but SGRQ scores remained higher (9.22 points; 95% CI 5.68, 12.76) in ILD patients compared to those with COPD (n=774, e-Table 1). Similarly, in the SF-12 PCS model, inclusion of IC/TLC ratio and DLCO attenuated the magnitude of the regression coefficient for diagnosis, but SF-12 PCS scores were still on average 2.04 points (95% CI 0.08, 4.00) lower in ILD compared to COPD (n=765, e-Table 2). In addition, evidence for an interaction between diagnosis and FEV<sub>1</sub> % persisted for both SGRQ (p<0.001) and SF-12 PCS (p=0.055) (e-Table 3).

**e-Table 1. Relationship between chronic lung disease diagnosis, other predictors, and total SGRQ score after adjustment for diffusing capacity and hyperinflation**

| Variables <sup>1</sup>                                          | Unadjusted $\beta$ |              |         | Adjusted $\beta$      |              |         |
|-----------------------------------------------------------------|--------------------|--------------|---------|-----------------------|--------------|---------|
|                                                                 | estimate           | 95% CI       | p value | estimate <sup>2</sup> | 95% CI       | p value |
| <b>Diagnosis</b><br>(ILD vs COPD)                               | 10.54              | 7.21, 13.86  | <0.001  | 9.22                  | 5.68, 12.76  | <0.001  |
| <b>FEV<sub>1</sub></b><br>(% predicted)                         | -0.42              | -0.48, -0.36 | <0.001  | -0.29                 | -0.37, -0.20 | <0.001  |
| <b>Age</b><br>(years)                                           | -0.78              | -0.94, -0.62 | <0.001  | -0.48                 | -0.64, -0.32 | <0.001  |
| <b>Gender</b><br>(M vs F)                                       | -3.85              | -7.18, -0.52 | 0.02    | 1.31                  | -1.57, 4.19  | 0.37    |
| <b>BMI</b><br>(kg/m <sup>2</sup> )                              | 0.45               | 0.17, 0.73   | 0.002   | 0.51                  | 0.25, 0.77   | <0.001  |
| <b>Supplemental O<sub>2</sub></b><br><b>at rest</b> (yes vs no) | 14.84              | 11.57, 18.11 | <0.001  | 5.64                  | 2.84, 8.44   | <0.001  |
| <b>IC/TLC ratio</b> (%)                                         | -0.31              | -0.44, -0.17 | <0.001  | -0.03                 | -0.19, 0.13  | 0.72    |
| <b>Mean DLCO</b><br>(mL/min/mmHg)                               | -1.72              | -1.98, -1.47 | <0.001  | -1.11                 | -1.41, -0.81 | <0.001  |

<sup>1</sup> Continuous variables (units): FEV<sub>1</sub> (% predicted), age (years), body mass index (BMI, kg/m<sup>2</sup>), ratio of inspiratory capacity to total lung capacity (IC/TLC, %), diffusing capacity of the lung for carbon monoxide (DLCO, mL/min/mmHg). Categorical variables (coding): diagnosis (ILD=1 COPD=0), gender (male=1, female=0), supplemental oxygen requirement at rest (yes=1, no=0). In an additional regression model (results not shown), BMI was modeled as a categorical variable rather than a continuous variable, but this did not alter the regression coefficient estimates or their statistical significance.

<sup>2</sup> Adjusted regression coefficient estimates are adjusted for all variables listed in the table as well as race (Caucasian=1, non-Caucasian=0) and comorbidities (1=yes, 0=no) including angina, congestive heart failure, diabetes, renal failure, cancer diagnosis, and rheumatologic disease. For this multiple linear regression analysis,  $r^2 = 0.44$ ,  $\sigma = 17.92$ . Compared with the original analysis, which included 976 observations, 774 observations that had complete data for IC/TLC ratio and mean DLCO were included in this supplemental analysis.

*Online supplements are not copyedited prior to posting.*

**e-Table 2. Relationship between chronic lung disease diagnosis, other predictors, and SF-12 PCS score after adjustment for diffusing capacity and hyperinflation**

| Variables <sup>3</sup>                                          | Unadjusted $\beta$ |              |         | Adjusted $\beta$      |              |         |
|-----------------------------------------------------------------|--------------------|--------------|---------|-----------------------|--------------|---------|
|                                                                 | estimate           | 95% CI       | p value | estimate <sup>4</sup> | 95% CI       | p value |
| <b>FEV<sub>1</sub></b><br>(% predicted)                         | 0.17               | 0.14, 0.20   | <0.001  | 0.09                  | 0.05, 0.14   | <0.001  |
| <b>Diagnosis</b><br>(ILD vs COPD)                               | -3.65              | -5.35, -1.96 | <0.001  | -2.04                 | -4.00, -0.08 | 0.04    |
| <b>Age</b><br>(years)                                           | 0.28               | 0.20, 0.37   | <0.001  | 0.22                  | 0.14, 0.31   | <0.001  |
| <b>Gender</b><br>(M vs F)                                       | -0.01              | -1.70, 1.67  | 0.99    | -2.53                 | -4.13, -0.92 | 0.002   |
| <b>BMI</b><br>(kg/m <sup>2</sup> )                              | -0.19              | -0.34, -0.05 | 0.008   | -0.23                 | -0.38, -0.09 | 0.002   |
| <b>Supplemental O<sub>2</sub></b><br><b>at rest</b> (yes vs no) | -6.93              | -8.59, -5.27 | <0.001  | -3.14                 | -4.70, -1.59 | <0.001  |
| <b>IC/TLC ratio</b> (%)                                         | 0.11               | 0.04, 0.18   | <0.001  | -0.02                 | -0.11, 0.07  | 0.69    |
| <b>Mean DLCO</b><br>(mL/min/mmHg)                               | 0.75               | 0.61, 0.88   | <0.001  | 0.62                  | 0.45, 0.79   | <0.001  |

<sup>3</sup> Continuous variables (units): FEV<sub>1</sub> (% predicted), age (years), body mass index (BMI, kg/m<sup>2</sup>), ratio of inspiratory capacity to total lung capacity (IC/TLC, %), diffusing capacity of the lung for carbon monoxide (DLCO, mL/min/mmHg). Categorical variables (coding): diagnosis (ILD=1 COPD=0), gender (male=1, female=0), supplemental oxygen requirement at rest (yes=1, no=0). In an additional regression model (results not shown), BMI was modeled as a categorical variable rather than a continuous variable, but this did not alter the regression coefficient estimates or their statistical significance.

<sup>4</sup> Adjusted regression coefficient estimates are adjusted for all variables listed in the table as well as race (Caucasian=1, non-Caucasian=0) and comorbidities (1=yes, 0=no) including angina, congestive heart failure, diabetes, renal failure, cancer diagnosis, and rheumatologic disease. For this multiple linear regression analysis,  $r^2 = 0.31$ ,  $\sigma = 9.93$ . Compared with the original analysis, which included 965 observations, 765 observations that had complete data for IC/TLC ratio and mean DLCO were included in this supplemental analysis.

*Online supplements are not copyedited prior to posting.*



**e-Table 3. Relationship between FEV<sub>1</sub> % predicted and HRQL score varies by chronic lung disease diagnosis after adjustment for hyperinflation and diffusing capacity**

| <b>Outcome</b>         | <b>Diagnosis</b> | <b>Adjusted <math>\beta</math> estimate for FEV<sub>1</sub> % predicted*</b> | <b>95% CI</b> | <b>p value for interaction term</b> |
|------------------------|------------------|------------------------------------------------------------------------------|---------------|-------------------------------------|
| <b>SGRQ score</b>      | ILD              | -0.11                                                                        | -0.24, 0.01   | <0.001                              |
|                        | COPD             | -0.35                                                                        | -0.44, -0.26  |                                     |
| <b>SF-12 PCS score</b> | ILD              | 0.04                                                                         | -0.03, 0.11   | 0.055                               |
|                        | COPD             | 0.11                                                                         | 0.06, 0.16    |                                     |

\*Regression coefficient estimates are adjusted for age, body mass index, gender, race, requirement for supplemental oxygen, inspiratory capacity to total lung capacity ratio, diffusing capacity, and comorbidities including angina, congestive heart failure, diabetes, renal failure, cancer diagnosis, and rheumatologic disease.



**e-Table 4. Relationship between chronic lung disease diagnosis, other predictors, and total SGRQ score using FVC % predicted**

| Variables <sup>5</sup>                                          | Unadjusted $\beta$ |                 |         | Adjusted $\beta$      |              |         |
|-----------------------------------------------------------------|--------------------|-----------------|---------|-----------------------|--------------|---------|
|                                                                 | estimate           | 95% CI          | p value | estimate <sup>6</sup> | 95% CI       | p value |
| <b>Diagnosis</b><br>(ILD vs COPD)                               | 11.34              | 8.36, 14.31     | <0.001  | 3.87                  | 1.13, 6.60   | 0.006   |
| <b>FVC</b><br>(% predicted)                                     | -0.61              | -0.67, -0.55    | <0.001  | -0.44                 | -0.51, -0.38 | <0.001  |
| <b>Age</b><br>(years)                                           | -0.85              | -0.99, -0.71    | <0.001  | -0.35                 | -0.48, -0.21 | <0.001  |
| <b>Gender</b><br>(M vs F)                                       | -3.64              | -6.65, -0.63    | 0.02    | -2.07                 | -4.50, 0.36  | 0.09    |
| <b>BMI</b><br>(kg/m <sup>2</sup> )                              | 0.31               | 0.05, 0.56      | 0.02    | 0.16                  | -0.06, 0.38  | 0.16    |
| <b>Supplemental O<sub>2</sub></b><br><b>at rest</b> (yes vs no) | 15.72              | 12.86,<br>18.57 | <0.001  | 8.34                  | 5.81, 10.88  | <0.001  |

<sup>5</sup> Continuous variables (units): forced vital capacity (FVC, % predicted), age (years), body mass index (BMI, kg/m<sup>2</sup>). Categorical variables (coding): diagnosis (ILD=1 COPD=0), gender (male=1, female=0), supplemental oxygen requirement at rest (yes=1, no=0). In an additional regression model (results not shown), BMI was modeled as a categorical variable rather than a continuous variable, but this did not alter the regression coefficient estimates or their statistical significance.

<sup>6</sup> Adjusted regression coefficient estimates are adjusted for all variables listed in the table as well as race (Caucasian=1, non-Caucasian=0) and comorbidities (1=yes, 0=no) including angina, congestive heart failure, diabetes, renal failure, cancer diagnosis, and rheumatologic disease. This multiple linear regression analysis included 976 observations for which complete data were available ( $r^2 = 0.39$ ,  $\sigma = 18.93$ ).

*Online supplements are not copyedited prior to posting.*



**e-Table 5. Relationship between chronic lung disease diagnosis, other predictors, and SF-12 PCS score using FVC % predicted**

| Variables <sup>7</sup>                                          | Unadjusted $\beta$ |              |         | Adjusted $\beta$      |              |         |
|-----------------------------------------------------------------|--------------------|--------------|---------|-----------------------|--------------|---------|
|                                                                 | estimate           | 95% CI       | p value | estimate <sup>8</sup> | 95% CI       | p value |
| <b>Diagnosis</b><br>(ILD vs COPD)                               | -3.60              | -5.10, -2.11 | <0.001  | -0.24                 | -1.72, 1.25  | 0.76    |
| <b>FVC</b><br>(% predicted)                                     | 0.24               | 0.21, 0.27   | <0.001  | 0.17                  | 0.14, 0.21   | <0.001  |
| <b>Age</b><br>(years)                                           | 0.30               | 0.23, 0.38   | <0.001  | 0.13                  | 0.06, 0.20   | <0.001  |
| <b>Gender</b><br>(M vs F)                                       | 0.003              | -1.49, 1.49  | 0.99    | -0.48                 | -1.80, 0.84  | 0.48    |
| <b>BMI</b><br>(kg/m <sup>2</sup> )                              | -0.16              | -0.29, -0.04 | 0.01    | -0.11                 | -0.23, 0.01  | 0.07    |
| <b>Supplemental O<sub>2</sub></b><br><b>at rest</b> (yes vs no) | -6.82              | -8.24, -5.39 | <0.001  | -4.02                 | -5.39, -2.64 | <0.001  |

<sup>7</sup> Continuous variables (units): forced vital capacity (FVC, % predicted), age (years), body mass index (BMI, kg/m<sup>2</sup>). Categorical variables (coding): diagnosis (ILD=1 COPD=0), gender (male=1, female=0), supplemental oxygen requirement at rest (yes=1, no=2). In an additional regression model (results not shown), BMI was modeled as a categorical variable rather than a continuous variable, but this did not alter the regression coefficient estimates or their statistical significance.

<sup>8</sup> Adjusted regression coefficient estimates are adjusted for all variables listed in the table as well as race (Caucasian=1, non-Caucasian=0) and comorbidities (1=yes, 0=no) including angina, congestive heart failure, diabetes, renal failure, cancer diagnosis, and rheumatologic disease. This multiple linear regression analysis included 965 observations for which complete data were available ( $r^2 = 0.26$ ,  $\sigma = 10.23$ ).

*Online supplements are not copyedited prior to posting.*



**e-Table 6. Relationship between FVC % predicted and HRQL score varies by chronic lung disease diagnosis**

| Outcome                | Diagnosis | Adjusted $\beta$ estimate for FVC % predicted* | 95% CI       | p value for interaction term |
|------------------------|-----------|------------------------------------------------|--------------|------------------------------|
| <b>SGRQ score</b>      | ILD       | -0.31                                          | -0.41, -0.20 | 0.001                        |
|                        | COPD      | -0.51                                          | -0.59, -0.43 |                              |
| <b>SF-12 PCS score</b> | ILD       | 0.11                                           | 0.05, 0.17   | 0.005                        |
|                        | COPD      | 0.21                                           | 0.17, 0.25   |                              |

\*Regression coefficient estimates are adjusted for age, body mass index, gender, race, requirement for supplemental oxygen, and comorbidities including angina, congestive heart failure, diabetes, renal failure, cancer diagnosis, and rheumatologic disease.



**e-Table 7. Relationship between chronic lung disease diagnosis, other predictors, and SGRQ symptoms component score**

| Variables <sup>9</sup>                                          | Unadjusted $\beta$ |              |         | Adjusted $\beta$       |              |         |
|-----------------------------------------------------------------|--------------------|--------------|---------|------------------------|--------------|---------|
|                                                                 | estimate           | 95% CI       | p value | estimate <sup>10</sup> | 95% CI       | p value |
| <b>Diagnosis</b><br>(ILD vs COPD)                               | 12.62              | 9.52, 15.71  | <0.001  | 15.62                  | 12.31, 19.10 | <0.001  |
| <b>FEV<sub>1</sub></b><br>(% predicted)                         | -0.27              | -0.33, 0.21  | <0.001  | -0.34                  | -0.41, -0.28 | <0.001  |
| <b>Age</b><br>(years)                                           | -0.65              | -0.81, -0.50 | <0.001  | -0.25                  | -0.48, 0.09  | 0.002   |
| <b>Gender</b><br>(M vs F)                                       | 1.57               | -1.58, 4.72  | 0.33    | 2.09                   | -0.75, 4.94  | 0.15    |
| <b>BMI</b><br>(kg/m <sup>2</sup> )                              | 0.46               | 0.19, 0.73   | 0.001   | 0.28                   | 0.02, 0.54   | 0.03    |
| <b>Supplemental O<sub>2</sub></b><br><b>at rest</b> (yes vs no) | 7.98               | 4.87, 11.10  | <0.001  | 2.06                   | -0.92, 5.04  | 0.18    |

<sup>9</sup> Continuous variables (units): FEV<sub>1</sub> (% predicted), age (years), body mass index (BMI, kg/m<sup>2</sup>). Categorical variables (coding): diagnosis (ILD=1 COPD=0), gender (male=1, female=0), supplemental oxygen requirement at rest (yes=1, no=0). In an additional regression model (results not shown), BMI was modeled as a categorical variable rather than a continuous variable, but this did not alter the regression coefficient estimates or their statistical significance.

<sup>10</sup> Adjusted regression coefficient estimates are adjusted for all variables listed in the table as well as race (Caucasian=1, non-Caucasian=0) and comorbidities (1=yes, 0=no) including angina, congestive heart failure, diabetes, renal failure, cancer diagnosis, and rheumatologic disease. This multiple linear regression analysis included 976 observations for which complete data were available ( $r^2 = 0.22$ ,  $\sigma = 22.19$ ).

*Online supplements are not copyedited prior to posting.*





**e-Table 8. Relationship between chronic lung disease diagnosis, other predictors, and SGRQ activity component score**

| Variables <sup>11</sup>                                         | Unadjusted $\beta$ |                   |         | Adjusted $\beta$       |                 |         |
|-----------------------------------------------------------------|--------------------|-------------------|---------|------------------------|-----------------|---------|
|                                                                 | estimate           | 95% CI            | p value | estimate <sup>12</sup> | 95% CI          | p value |
| <b>Diagnosis</b><br>(ILD vs COPD)                               | 11.13              | 7.15, 15.10       | <0.001  | 16.67                  | 12.94,<br>20.41 | <0.001  |
| <b>FEV<sub>1</sub></b><br>(% predicted)                         | -0.62              | -0.69, -0.55      | <0.001  | -0.65                  | -0.72, -0.58    | <0.001  |
| <b>Age</b><br>(years)                                           | -1.02              | -1.21, -0.83      | <0.001  | -0.17                  | -0.34, 0.002    | 0.05    |
| <b>Gender</b><br>(M vs F)                                       | -7.79              | -11.74, -<br>3.84 | <0.001  | -6.46                  | -9.51, -3.41    | <0.001  |
| <b>BMI</b><br>(kg/m <sup>2</sup> )                              | 0.41               | 0.07, 0.75        | 0.02    | 0.48                   | 0.20, 0.76      | 0.001   |
| <b>Supplemental O<sub>2</sub></b><br><b>at rest</b> (yes vs no) | 21.12              | 17.42,<br>24.93   | <0.001  | 9.55                   | 6.36, 12.74     | <0.001  |

<sup>11</sup> Continuous variables (units): FEV<sub>1</sub> (% predicted), age (years), body mass index (BMI, kg/m<sup>2</sup>). Categorical variables (coding): diagnosis (ILD=1 COPD=0), gender (male=1, female=0), supplemental oxygen requirement at rest (yes=1, no=0). In an additional regression model (results not shown), BMI was modeled as a categorical variable rather than a continuous variable, but this did not alter the regression coefficient estimates or their statistical significance.

<sup>12</sup> Adjusted regression coefficient estimates are adjusted for all variables listed in the table as well as race (Caucasian=1, non-Caucasian=0) and comorbidities (1=yes, 0=no) including angina, congestive heart failure, diabetes, renal failure, cancer diagnosis, and rheumatologic disease. This multiple linear regression analysis included 976 observations for which complete data were available ( $r^2 = 0.44$ ,  $\sigma = 23.79$ ).

*Online supplements are not copyedited prior to posting.*

**e-Table 9. Relationship between chronic lung disease diagnosis, other predictors, and SGRQ impacts component score**

| Variables <sup>13</sup>                                         | Unadjusted $\beta$ |                 |         | Adjusted $\beta$       |                 |         |
|-----------------------------------------------------------------|--------------------|-----------------|---------|------------------------|-----------------|---------|
|                                                                 | estimate           | 95% CI          | p value | estimate <sup>14</sup> | 95% CI          | p value |
| <b>Diagnosis</b><br>(ILD vs COPD)                               | 10.80              | 7.87, 13.72     | <0.001  | 14.27                  | 11.33,<br>17.22 | <0.001  |
| <b>FEV<sub>1</sub></b><br>(% predicted)                         | -0.39              | -0.44, -0.34    | <0.001  | -0.39                  | -0.45, -0.34    | <0.001  |
| <b>Age</b><br>(years)                                           | -0.82              | -0.96, -0.68    | <0.001  | -0.27                  | -0.41, -0.14    | <0.001  |
| <b>Gender</b><br>(M vs F)                                       | -2.86              | -5.82, 0.09     | 0.06    | -1.66                  | -4.06, 0.75     | 0.18    |
| <b>BMI</b><br>(kg/m <sup>2</sup> )                              | 0.19               | -0.06, 0.44     | 0.14    | 0.10                   | -0.12, 0.33     | 0.36    |
| <b>Supplemental O<sub>2</sub></b><br><b>at rest</b> (yes vs no) | 15.27              | 12.47,<br>18.08 | <0.001  | 7.85                   | 5.34, 10.37     | <0.001  |

<sup>13</sup> Continuous variables (units): FEV<sub>1</sub> (% predicted), age (years), body mass index (BMI, kg/m<sup>2</sup>). Categorical variables (coding): diagnosis (ILD=1 COPD=0), gender (male=1, female=0), supplemental oxygen requirement at rest (yes=1, no=0). In an additional regression model (results not shown), BMI was modeled as a categorical variable rather than a continuous variable, but this did not alter the regression coefficient estimates or their statistical significance.

<sup>14</sup> Adjusted regression coefficient estimates are adjusted for all variables listed in the table as well as race (Caucasian=1, non-Caucasian=0) and comorbidities (1=yes, 0=no) including angina, congestive heart failure, diabetes, renal failure, cancer diagnosis, and rheumatologic disease. This multiple linear regression analysis included 976 observations for which complete data were available ( $r^2 = 0.37$ ,  $\sigma = 18.77$ ).

*Online supplements are not copyedited prior to posting.*



**e-Figure 1.** Boxplot distribution of SGRQ scores by deciles of FEV<sub>1</sub> % predicted (n=981).

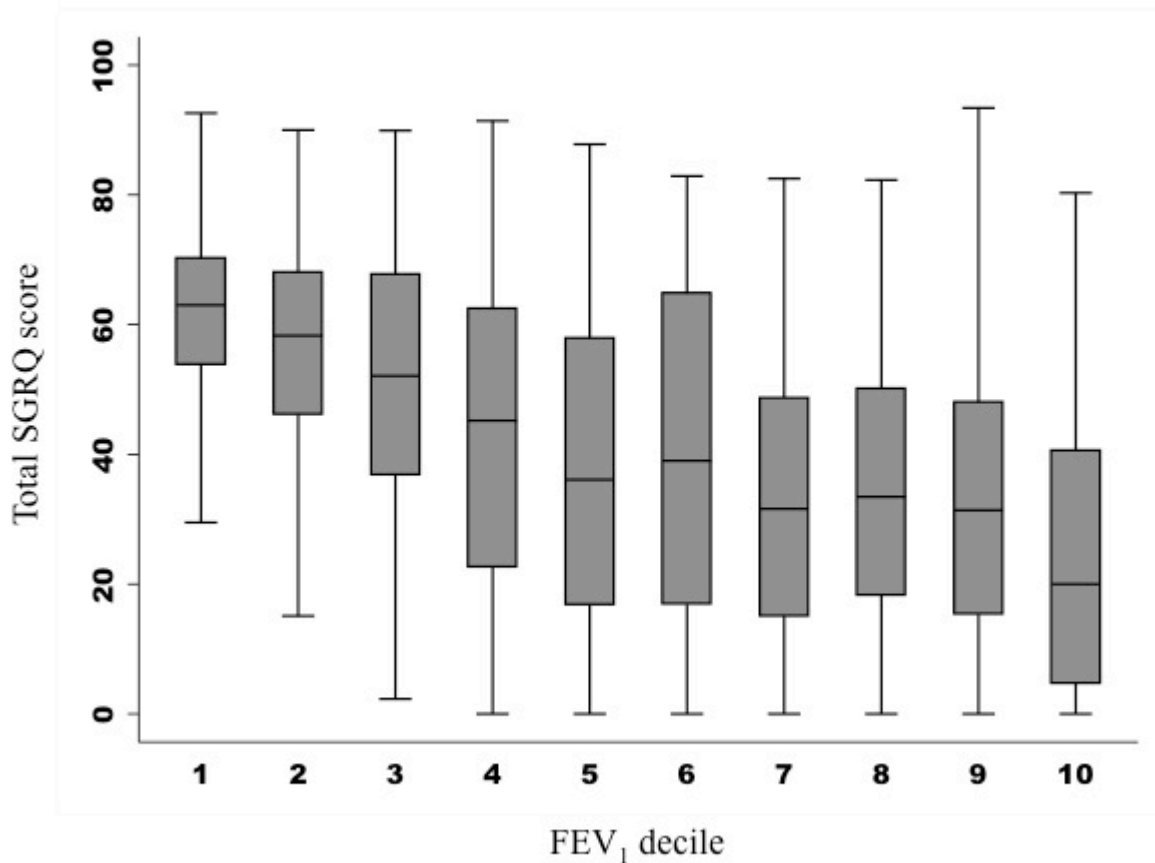

1<sup>st</sup> decile: 10-21% predicted; 2<sup>nd</sup> decile: 22-31% predicted; 3<sup>rd</sup> decile: 32-43% predicted; 4<sup>th</sup> decile: 44-54% predicted; 5<sup>th</sup> decile: 55-62% predicted; 6<sup>th</sup> decile: 63-69% predicted; 7<sup>th</sup> decile: 70-75% predicted; 8<sup>th</sup> decile: 76-82% predicted; 9<sup>th</sup> decile: 83-90% predicted; 10<sup>th</sup> decile: 91-133% predicted

*Online supplements are not copyedited prior to posting.*



**e-Figure 2.** Boxplot distribution of SF-12 PCS scores by deciles of FEV<sub>1</sub> % predicted (n=967).

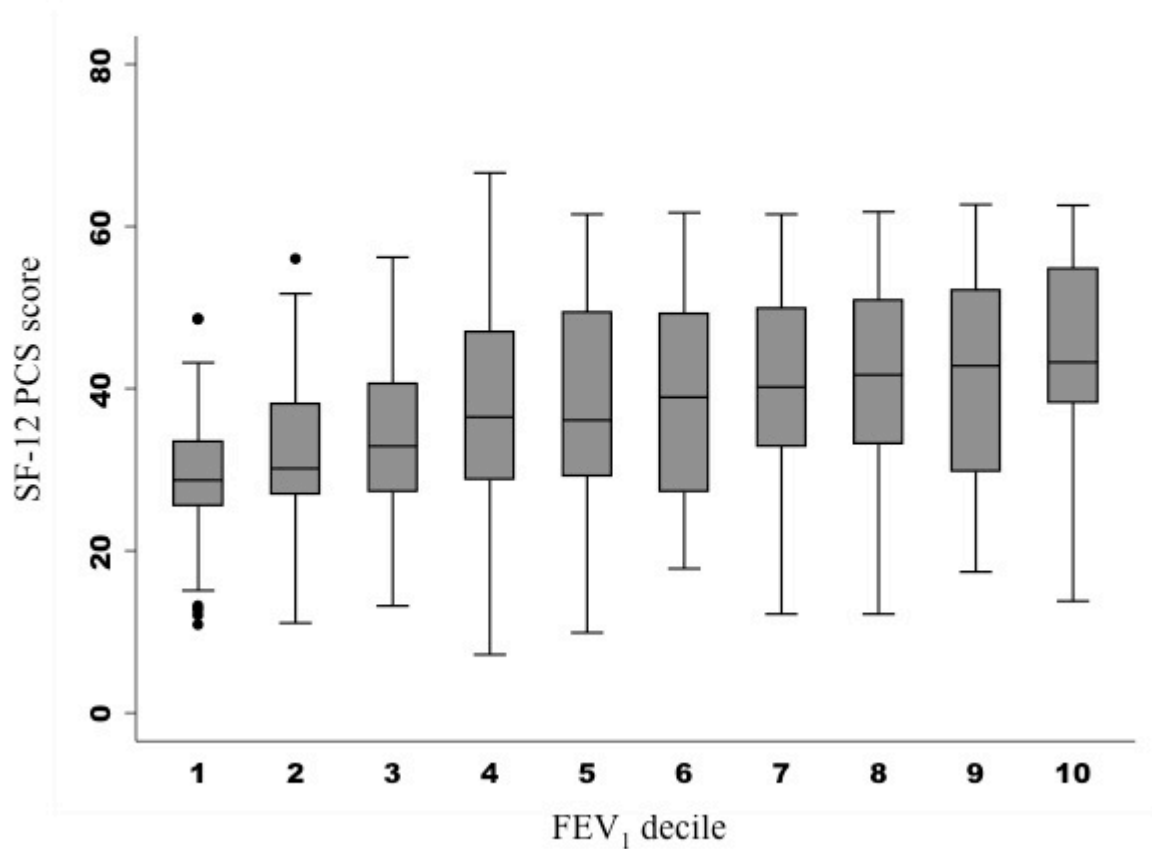

1<sup>st</sup> decile: 10-21% predicted; 2<sup>nd</sup> decile: 22-31% predicted; 3<sup>rd</sup> decile: 32-43% predicted; 4<sup>th</sup> decile: 44-54% predicted; 5<sup>th</sup> decile: 55-62% predicted; 6<sup>th</sup> decile: 63-69% predicted; 7<sup>th</sup> decile: 70-75% predicted; 8<sup>th</sup> decile: 76-82% predicted; 9<sup>th</sup> decile: 83-90% predicted; 10<sup>th</sup> decile: 91-133% predicted

*Online supplements are not copyedited prior to posting.*



**e-Figure 3.** LOWESS plot of total SGRQ score versus FEV<sub>1</sub> % predicted demonstrates a linear relationship (bandwidth 0.5).

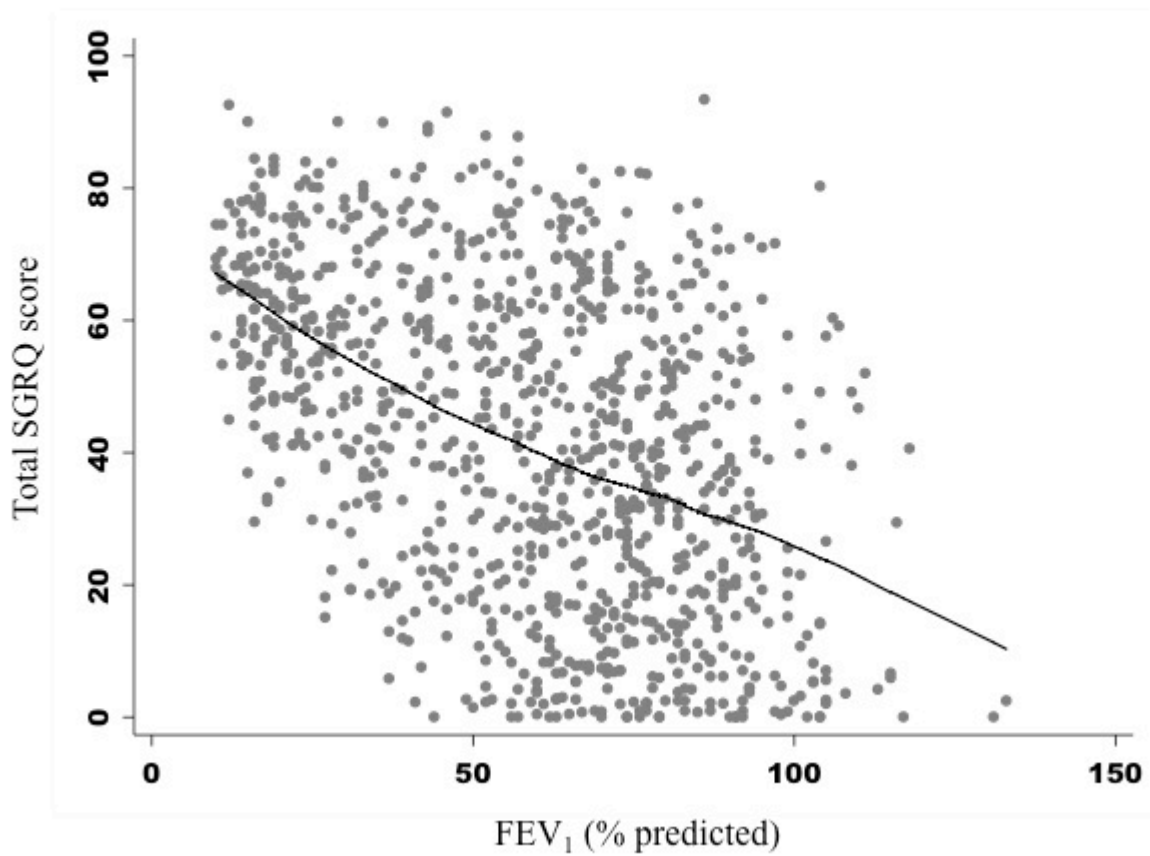

*Online supplements are not copyedited prior to posting.*



**e-Figure 4.** LOWESS plot of SF-12 PCS score versus FEV<sub>1</sub> % predicted demonstrates a linear relationship (bandwidth 0.5).

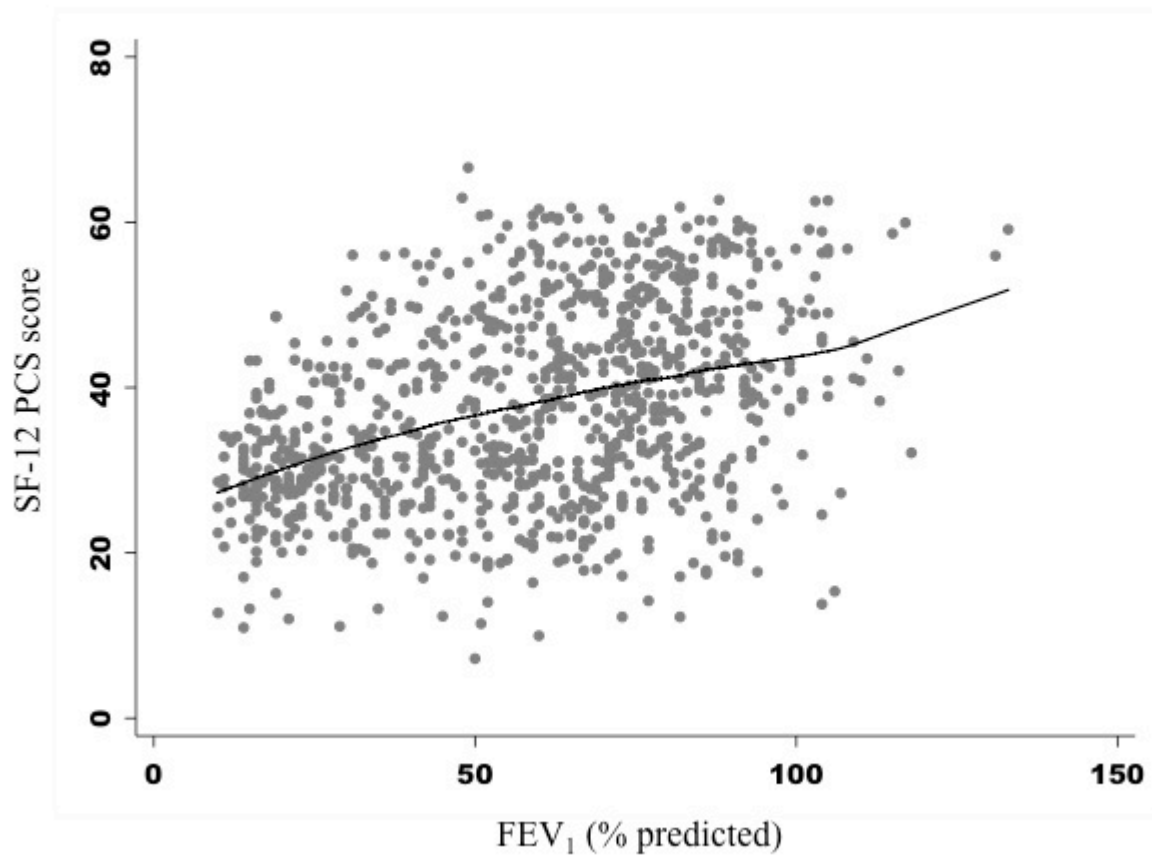

*Online supplements are not copyedited prior to posting.*



**e-Figure 5.** Boxplot distribution of SGRQ scores by deciles of FVC % predicted (n=981).

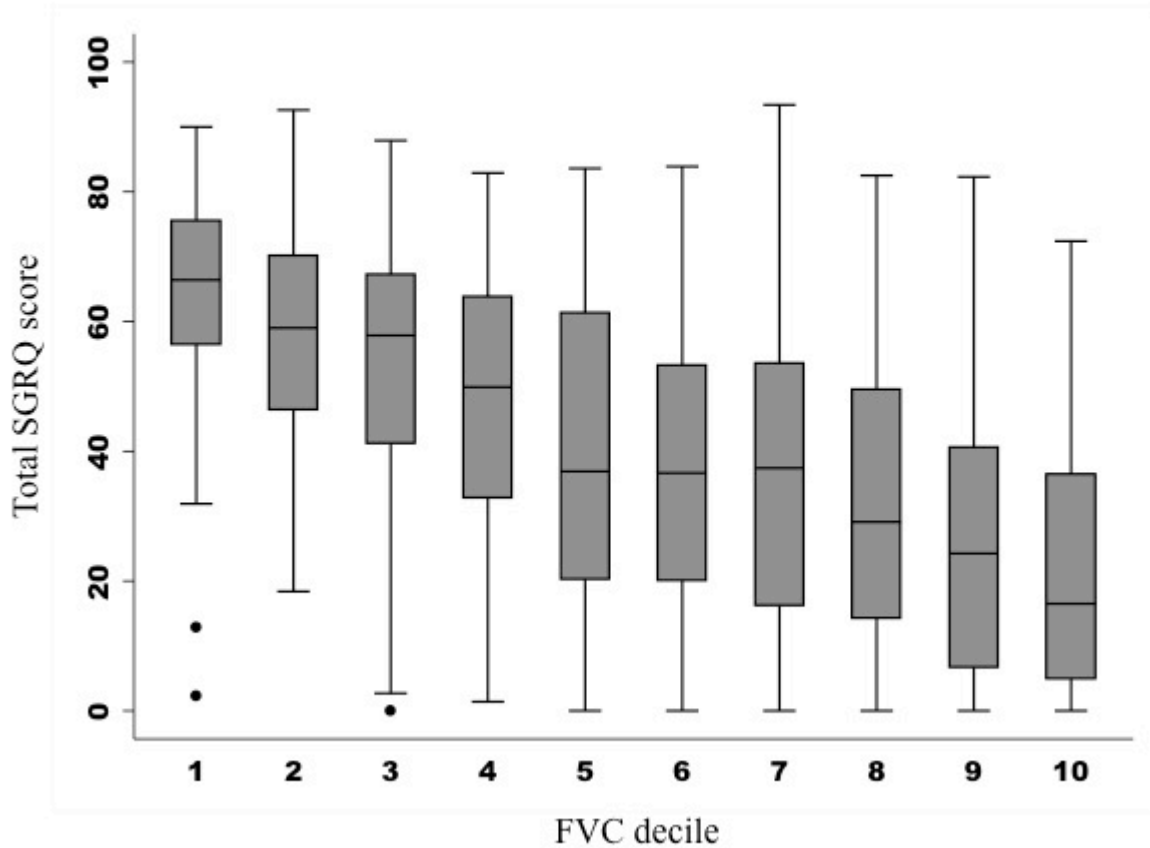

1<sup>st</sup> decile: 13-41% predicted; 2<sup>nd</sup> decile: 42-50% predicted; 3<sup>rd</sup> decile: 51-58% predicted; 4<sup>th</sup> decile: 59-64% predicted; 5<sup>th</sup> decile: 65-69% predicted; 6<sup>th</sup> decile: 70-75% predicted; 7<sup>th</sup> decile: 76-81% predicted; 8<sup>th</sup> decile: 82-87% predicted; 9<sup>th</sup> decile: 88-97% predicted; 10<sup>th</sup> decile: 98-139% predicted

*Online supplements are not copyedited prior to posting.*



**e-Figure 6.** Boxplot distribution of SF-12 PCS scores by deciles of FVC % predicted (n=967).

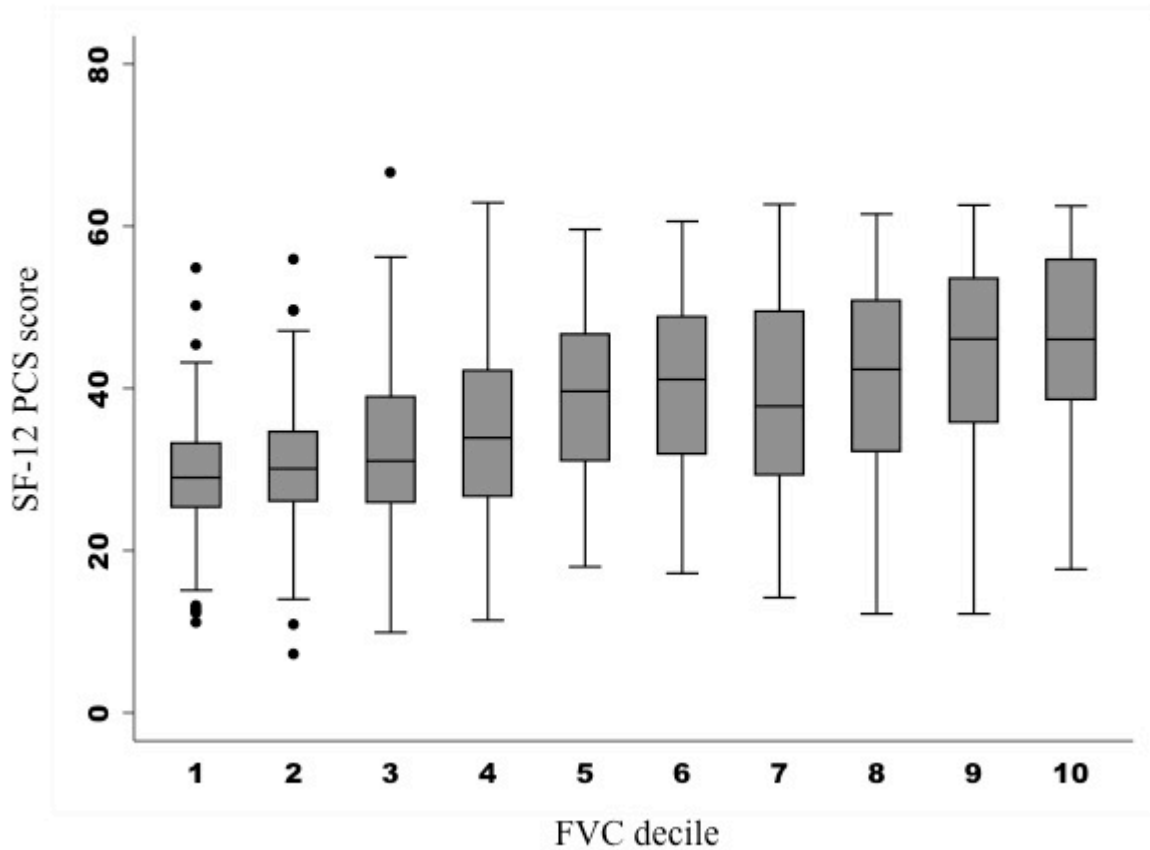

1<sup>st</sup> decile: 13-41% predicted; 2<sup>nd</sup> decile: 42-50% predicted; 3<sup>rd</sup> decile: 51-58% predicted; 4<sup>th</sup> decile: 59-64% predicted; 5<sup>th</sup> decile: 65-69% predicted; 6<sup>th</sup> decile: 70-75% predicted; 7<sup>th</sup> decile: 76-81% predicted; 8<sup>th</sup> decile: 82-87% predicted; 9<sup>th</sup> decile: 88-97% predicted; 10<sup>th</sup> decile: 98-139% predicted

*Online supplements are not copyedited prior to posting.*





**e-Figure 7.** LOWESS plot of total SGRQ score versus FVC % predicted demonstrates a linear relationship (bandwidth 0.5).

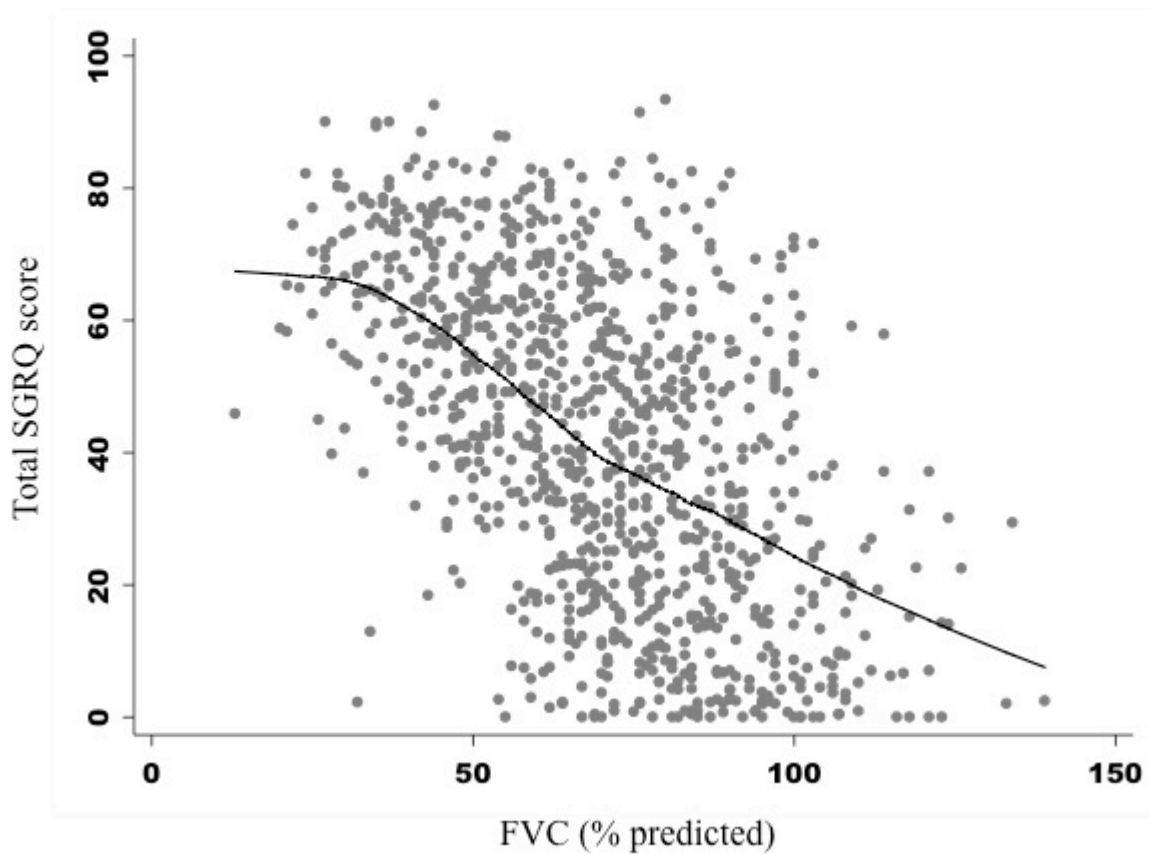

*Online supplements are not copyedited prior to posting.*



**e-Figure 8.** LOWESS plot of SF-12 PCS score versus FVC % predicted demonstrates a linear relationship (bandwidth 0.5).

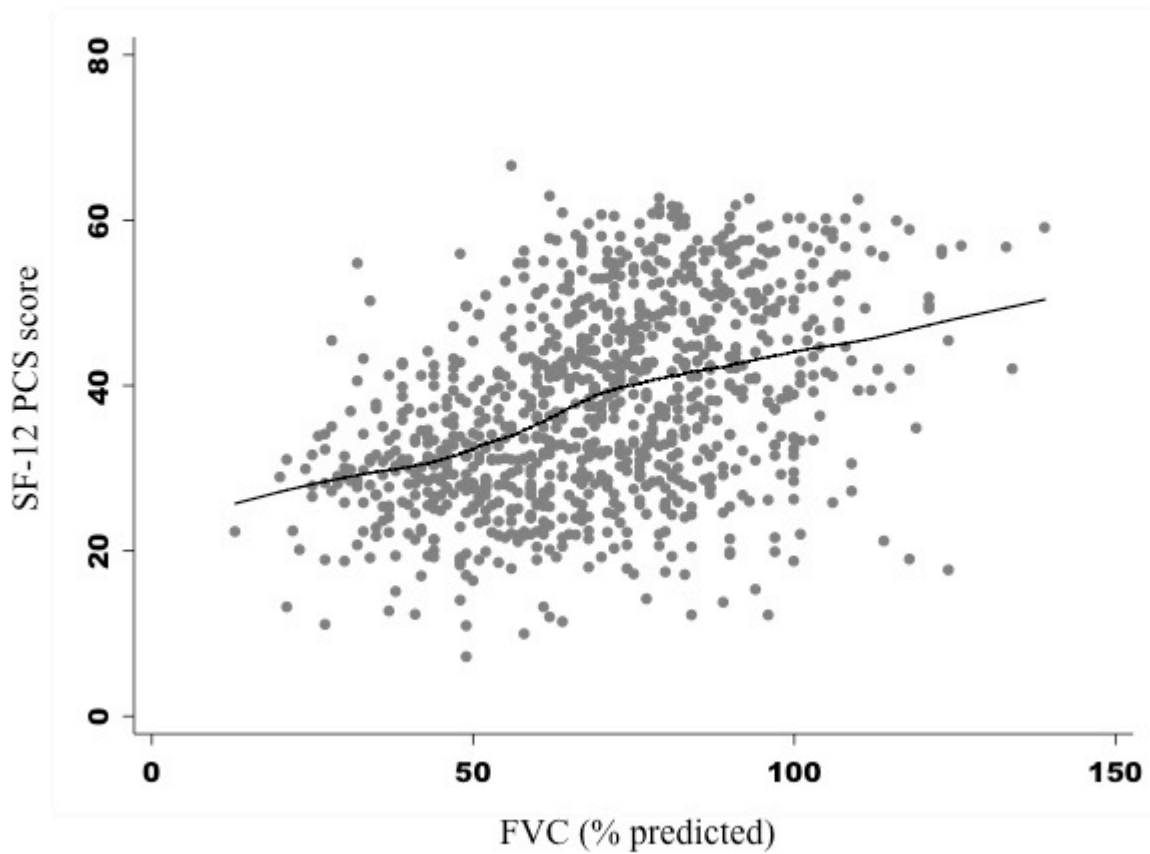

*Online supplements are not copyedited prior to posting.*
